# Supplementary material for: Treatment of Recent-Onset Type 1 Diabetic Patients With DiaPep277: Results of a Double-Blind, Placebo-Controlled, Randomized Phase 3 Trial
Source: Oxford University Press journal article supplement (doi:10.2337/dc13-1391), 2014-04-10
Supplement: dc131391supplementarydata.pdf [file dc131391supplementarydata.pdf]

# **The DIA-AID 1 Writing Group**

Domingo Acosta-Delgado, University Hospital Virgen del Rocío, Seville, SP; Riitta Liisa Antikainen, Tutkimusyksikkö, Oulu, FI; Khajag Azejian, Tikkurilan Terveyskeskus (Tikkurila Health Center), Vantaa, FI; Ilaria Barchetta, Università "La Sapienza" di Roma, Rome, IT; Marco Giorgio Baroni, Diabetes Unit, Azienda Ospedaliero-Universitaria di Cagliari Policlinico Universitario, Monserrato, IT; Pierre Yves Benhamou, CHU de Grenoble, Grenoble, FR.; Bernhard Böhm, Universitätsklinikum Ulm, Ulm, DE; Susan Brown, Donald Gordon Medical Center, Johannesburg, SA; Maria Gisella Cavallo, Università "La Sapienza" di Roma, Rome, IT; Franco Cavalot, Internal Medicine and Metabolic Disease Unit Department of Clinical and Biological Sciences of the Turin University San Luigi Gonzaga Hospital, Orbassano, IT; Massimo Chirio, Internal Medicine and Metabolic Disease Unit Department of Clinical and Biological Sciences of the Turin University San Luigi Gonzaga Hospital, Orbassano, IT; Efisio Cossu, Diabetes Unit, Azienda Ospedaliero-Universitaria, di Cagliari Policlinico Universitario, Monserrato, IT; José M. Cubero, Hospital de la Santa Creu i Sant Pau, Universitat Autònoma, Barcelona, SP; Thomas Danne, Diabetes Centre for Children and Adolescents, Kinderkrankenhaus auf der Bult., Hannover, DE; Nicolin Datz, Diabetes Centre for Children and Adolescents, Kinderkrankenhaus auf der Bult., Hannover, DE; Elvira Fioriti, University Campus Bio-Medico, Rome, IT; Stefano Genovese, Istituto Clinico Humanitas, Rozzano, IT; José-Miguel González-Clemente, Hospital de Sabadell, SP; Chiara Guglielmi, University Campus Bio-Medico, Rome, IT; Vesa Ilvesmäki, Päijät-Hämeen Keskussairaala, Lahti, FI; Vuokko Kallioniemi, Diabetestutkimus, Tampere, FI; Shadi Kyanvash, University Campus Bio-Medico, Rome, IT; Olga Kordonouri, Diabetes Centre for Children and Adolescents, Kinderkrankenhaus auf der Bult., Hannover, DE; Sudhesh Kumar, Walsgrave Hospital, Coventry, UK; Alberto de Leiva, Hospital de la Santa Creu i Sant Pau, Universitat Autònoma, Barcelona, SP; Dan Lender, Diabetes Unit, Hadassah University Hospital, Jerusalem, Israel; Richard David Graham Leslie, St. Bartholomew's Hospital, London, UK; Esther Lieberman, Soroka University Medical Center; Beer Sheva, ISR; Iñaki Llorente, Hospital Universitario Nuestra, Tenerife, SP; Katerina Loykova, Faculty Hospital Olomouc, CZ; Andrew Macleod, Hummingbird Centre, Royal Shrewsbury Hospital, Shrewsbury UK; Jussi Malmi, Pohjois-Karjala Projektin Tutkimussäätiö, Joensuu, FI.; Erika Marquardt, Diabetes Centre for Children and Adolescents, Kinderkrankenhaus auf der Bult., Hannover, DE; Ofri Mosenzon, Diabetes Unit, Hadassah University Hospital, Jerusalem, Israel; Terezie Pelikánová, IKEM/Diabetes Centre, Prague, CZ; Pavlina Pithova, Faculty Hospital Motol, Prague, CZ; Paolo Poy, Internal Medicine and Metabolic Disease Unit Department of Clinical and Biological Sciences of the Turin University San Luigi Gonzaga Hospital, Orbassano, IT; Sotirios A. Raptis, Research Institute and Diabetes Centre, Athens, GR; Leslie Ivan "Mac" Robertson, 102 Parklands Medical Centre, Durban, SA; Michel Rodier, CHU de Nîmes/ Hôpital Caremeau, Nîmes, FR; Jaroslav Rybka, Regional Hospital Bata a.s., Zlín, CZ; Kerstin Schnell, Diabetes Centre for Children and Adolescents, Kinderkrankenhaus auf der Bult., Hannover, DE; Zdenek Sumnik, Faculty Hospital Motol, Prague, CZ; Nikolaos Tentolouris, LAIKO Hospital, Athens, GR; Charles Thivolet, Hopital Edouard Herriot, Lyon, FR; Mariella Trovati, Internal Medicine and Metabolic Disease Unit Department of Clinical and Biological Sciences of the Turin University San Luigi Gonzaga Hospital, Orbassano, IT; Christian Tsioli, Diabetes Centre for Children and Adolescents, Kinderkrankenhaus auf der Bult., Hannover, DE; Dario Tuccinardi, University Campus Bio-Medico, Rome, IT; Jaakko Tuomilehto, University of Helsinki, Helsinki, FI.; Jan Vavrinec, Faculty Hospital Motol, Prague, CZ; Bernard Vialettes, Hopital La Timone, Marseille, FR; Jeffery Robert Wing, Donald Gordon Medical Center, Johannesburg, SA; Holger Oswald Wellmann, Helderberg Clinical Trials Unit, Cape Town, SA; and Donald Whitelaw, Bradford Royal Infirmary, Bradford, UK.

## SUPPLEMENTARY DATA

**Supplementary Table 1.** Parameters of Patients Screened for Eligibility.

| Parameter                    | Average $\pm$ SD (minimum - maximum) |
|------------------------------|--------------------------------------|
| Gender                       | 457 Males / 222 Females              |
| Age (years)                  | 27.4 $\pm$ 7.92 (15 - 47)            |
| Time from diagnosis (months) | 1.87 $\pm$ 1.27 (0 – 8.57)           |
| BMI (kg/m <sup>2</sup> )     | 22.9 $\pm$ 3.43 (16 – 39.5)          |
| Fasting C-peptide (nmol/l)   | 0.46 $\pm$ 0.30 (0.07 – 2.46)        |
| HbA1c (%)                    | 7.52 $\pm$ 1.88 (4 - 17)             |
| Autoantibodies (% positive)  | IA2A 51.2%, IAA 65.8%, GADA 75.4%    |

**Supplementary Table 2.** Inclusion / Exclusion Criteria that were Violated by Patients Excluded from ITT to Form the mITT Population Prior to Unmasking.

| Inclusion / Exclusion Criteria Violated                                                  | Number of Subjects |
|------------------------------------------------------------------------------------------|--------------------|
| No affirmation of T1D                                                                    | 12                 |
| Time from Diagnosis (not newly diagnosed)                                                | 5                  |
| Age at Randomization (either <16 or >45)                                                 | 7                  |
| Ketonuria & proteinuria at visit 1; Use of Metformin                                     | 1                  |
| Repeated tests of ketonuria, proteinuria, hematuria                                      | 2                  |
| Ketones in urine and weight loss > 10%                                                   | 1                  |
| No insulin taken for at least 2 months after diagnosis                                   | 3                  |
| Underlying disease                                                                       | 1                  |
| Received both allocations (treatment group cannot be determined for efficacy evaluation) | 2                  |

### Calculations Used for Data Analysis

Change from baseline in AUC =  $AUC_{24 \text{ months}} - AUC_{\text{baseline}}$

Relative treatment effect =  $(1 - \text{LS mean}_{\text{DiaPep277}}^{\text{®}} / \text{LS mean}_{\text{Placebo}}) \times 100$ .

Rate of hypoglycemic events/month was calculated as follows (based on 30 days per month):

Rate of Events/month at Baseline = Number of Events /  $\{[(\text{Month } 3 - \text{Baseline}) + 1] / 30\}$ ; Rate of

Events/month at Study End = Number of Events /  $\{[(\text{Month } 24 - \text{Month } 3) + 1] / 30\}$ .

Change of Hypoglycemic Event Rate = (Hypoglycemic event rate at Month 24 - Hypoglycemic event rate at Month 3).

SUPPLEMENTARY DATA

**Supplementary Table 3.** Hypoglycemia Classification.

| Severity                                                                                                   | Symptoms                            | Plasma Glucose                                                                                                       | Action Taken                                                                                           | Classification                          |
|------------------------------------------------------------------------------------------------------------|-------------------------------------|----------------------------------------------------------------------------------------------------------------------|--------------------------------------------------------------------------------------------------------|-----------------------------------------|
| Subject able to initiate self-treatment if necessary                                                       | Symptoms suggestive of hypoglycemia | < 70 mg/dL (3.9 mmol/L)                                                                                              | Enter in Glycemia Study Diary eCRF including the actions taken                                         | Symptomatic Hypoglycemia*               |
|                                                                                                            | Symptoms suggestive of hypoglycemia | ≥70 mg/dL (3.9 mmol/L)                                                                                               | Enter in Glycemia Study Diary eCRF including the actions taken                                         | Relative Hypoglycemia*                  |
|                                                                                                            | Symptoms suggestive of hypoglycemia | Not taken                                                                                                            | Enter in Glycemia Study Diary eCRF including the actions taken                                         | Probable symptomatic Hypoglycemia*      |
|                                                                                                            | Asymptomatic                        | < 70 mg/dL (3.9 mmol/L)                                                                                              | Enter in Glycemia Study Diary eCRF including the actions taken                                         | Asymptomatic Hypoglycemia*              |
| Subject is unable to initiate self-treatment and requires assistance of another person or hospitalization. | Symptoms suggestive of hypoglycemia | < 70 mg/dL (3.9 mmol/L)                                                                                              | Enter in Glycemia Study Diary eCRF Report as SAE if criteria are fulfilled including the actions taken | Severe Hypoglycemia* SAE, if applicable |
|                                                                                                            | Symptoms suggestive of hypoglycemia | Clinical manifestation reversed by administration of oral carbohydrate, subcutaneous glucagon or intravenous glucose | Enter in Glycemia Study Diary eCRF Report as SAE if criteria are fulfilled including the actions taken | Severe Hypoglycemia* SAE, if applicable |

# SUPPLEMENTARY DATA

**Supplementary Table 4.** Reasons for Screen Failure.

|                                                      | Number | Percentage |
|------------------------------------------------------|--------|------------|
| Autoantibodies negative                              | 54     | 24.32      |
| Low C-peptide                                        | 54     | 24.32      |
| Withdrawal of Consent                                | 40     | 18.02      |
| Failed to comply with inclusion/exclusion criteria   | 21     | 9.46       |
| Patient not compliant with requirements of the study | 19     | 8.56       |
| Aberrant lab results                                 | 10     | 4.50       |
| Time from Diagnosis not applicable                   | 8      | 3.60       |
| Lost to follow-up                                    | 5      | 2.25       |
| BMI out of range                                     | 4      | 1.80       |
| Age                                                  | 2      | 0.90       |
| Unexplained weight loss                              | 2      | 0.90       |
| Allergy to penicillin                                | 1      | 0.45       |
| Worsening or complication of the underlying disease  | 1      | 0.45       |
| Hyperglycemic Event                                  | 1      | 0.45       |
| Total                                                | 222    | 100        |

**Supplementary Table 5.** Drop-out Patients: Breakdown by Reason and Allocation.

| Reasons for not Completing the Study                                 | Total | Breakdown by Allocation |         |
|----------------------------------------------------------------------|-------|-------------------------|---------|
|                                                                      |       | DiaPep277 <sup>®</sup>  | Placebo |
| Withdrawal of Consent                                                | 36    | 17                      | 19      |
| Lost to follow-up                                                    | 19    | 6                       | 13      |
| Patient not compliant with requirements of the study                 | 10    | 6                       | 4       |
| Adverse Event                                                        | 9     | 6                       | 3       |
| HbA1c withdrawal criteria                                            | 8     | 5                       | 3       |
| Serious Adverse Event                                                | 4     | 2                       | 2       |
| Dermal Hypersensitivity                                              | 3     | 0                       | 3       |
| Other                                                                | 3     | 2                       | 1       |
| Patient's findings or conduct failed to meet protocol entry criteria | 3     | 2                       | 1       |
| Patient requires use of an unacceptable medication                   | 2     | 0                       | 2       |
| Death                                                                | 1     | 1                       | 0       |
| Other: Occurrence of a concomitant disease                           | 1     | 0                       | 1       |
| Pregnancy                                                            | 1     | 1                       | 0       |
| Protocol Violation                                                   | 1     | 1                       | 0       |
| Termination by sponsor                                               | 1     | 1                       | 0       |
| Total                                                                | 102   | 50                      | 52      |
| Patients included in the primary efficacy endpoint analysis          | 35    | 18                      | 17      |

# SUPPLEMENTARY DATA

**Supplementary Table 6.** Exploratory Analysis, The Proportion of Patients in Partial Remission at Study End (HbA1c  $\leq$  7% and Insulin Dose  $\leq$  0.5 U/kg/day).

|                                        | % of Patients                       |                      | p value |
|----------------------------------------|-------------------------------------|----------------------|---------|
| mITT Population                        |                                     |                      |         |
|                                        | DiaPep277 <sup>®</sup><br>(N = 159) | Placebo<br>(N = 167) |         |
| HbA1c ≤7% & Insulin Dose ≤0.5 U/kg/day | 38.4                                | 29.3                 | 0.085   |
| HbA1c >7% & Insulin Dose >0.5 U/kg/day | 27                                  | 37.7                 | 0.04    |
| PP Population                          |                                     |                      |         |
|                                        | DiaPep277 <sup>®</sup><br>(N = 146) | Placebo<br>(N = 162) |         |
| HbA1c ≤7% & Insulin Dose ≤0.5 U/kg/day | 41.8                                | 30.2                 | 0.035   |
| HbA1c >7% & Insulin Dose >0.5 U/kg/day | 23.3                                | 37.7                 | 0.006   |

**Supplementary Table 7.** Overall Summary of Treatment Emergent Adverse Events.

|                                                                                     | DiaPep277 <sup>®</sup><br>(N=225) | Placebo<br>(N=231)    | Total<br>(N=456) |
|-------------------------------------------------------------------------------------|-----------------------------------|-----------------------|------------------|
| Number of Patients with at Least One TEAE                                           | 173 (76.9%)                       | 164 (71%)             | 337 (73.9%)      |
| Number of Patients with at Least One Serious TEAE Not Considered to be Drug Related | 23 (10.2%)                        | 13 (5.6%)             | 36 (7.9%)        |
| Number of Patients with at Least One Suspected Drug-Related Serious TEAE            | 3 (1.3%)                          | 1 (0.4%)              | 4 (0.9%)         |
| Number of Patients with at Least One Life threatening TEAE                          | 2 (0.9%)                          | 2 (0.9%)              | 4 (0.9%)         |
| Number of Patients with at Least One Severe TEAE                                    | 20 (8.9%)                         | 13 (5.6%)             | 33 (7.2%)        |
| Number of Patients with at Least One Suspected Drug-Related AE                      | 31 (13.8%)                        | 34 (14.7%)            | 65 (14.3%)       |
| Number of Subject Deaths                                                            | 1 (0.4%)                          | 1 (0.4%) <sup>1</sup> | 2 (0.4%)         |

N= number of patients; TEAE= treatment emergent adverse event; AE= adverse event

<sup>1</sup>This life-threatening event and death documented in the Placebo group did not occur in a study patient, but in the neonate of a male patient (Patient 4309-002). The partner of the patient became pregnant during the study and gave birth to twins prematurely. One of the twin babies died during the study. The life-threatening event and death was recorded in the database under the Placebo group. There were no significant differences in the TEAEs between the Diapep277<sup>®</sup> treated and the Placebo treated groups by Fisher's exact test.

SUPPLEMENTARY DATA

Supplementary Fig 1.

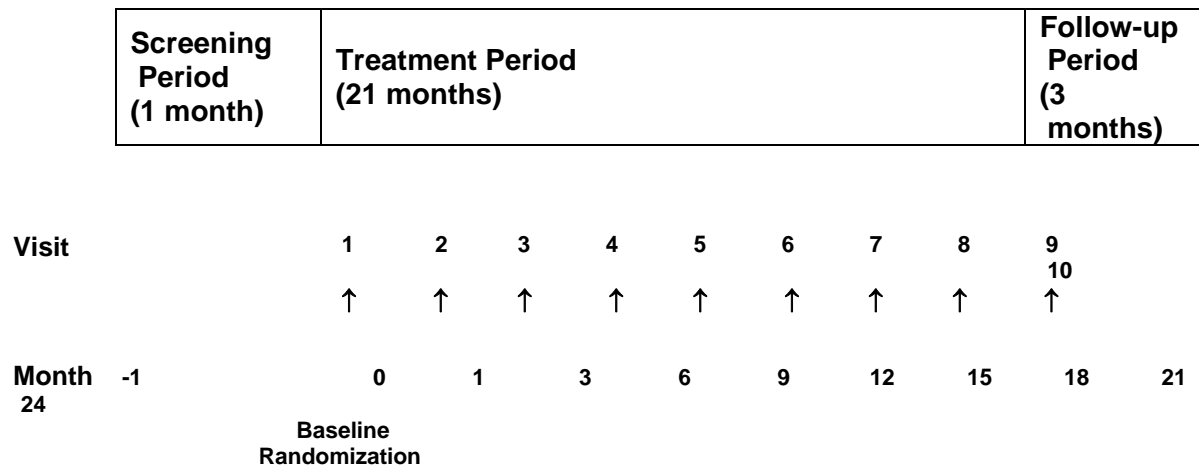

↑ Application of blinded study medication

Supplementary Figure 2. Change from Baseline in Glucagon-Stimulated Peak  $C_{\max}$  Secretion.  
A

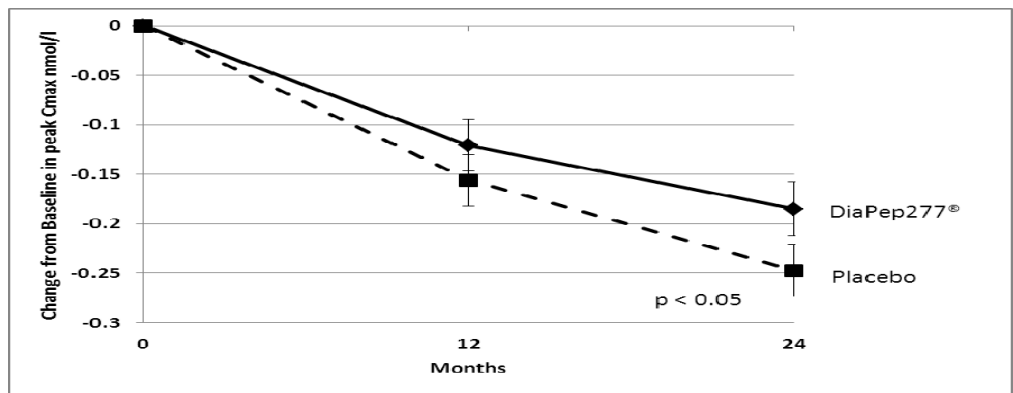

B

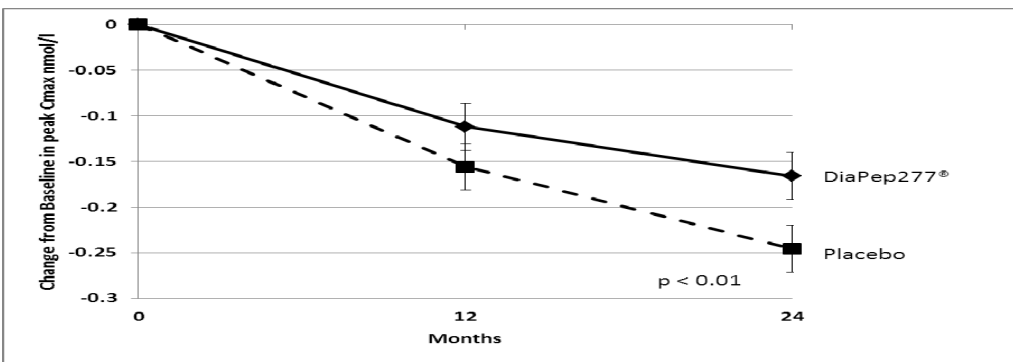

Mean changes ( $\pm$  SE of means) in maximum C-peptide concentration ( $C_{\max}$ ) as determined using the 20 min glucagon stimulation test in (A) the mITT population and (B) the PP population. \* $P < 0.05$ .
